# Supplementary material
Source: publisher site journal article supplement (https://www.dovepress.com/article/530214)
Supplement: Supplementary file 1 [file 530214%20Revised%20Supporting%20information.pdf]

**Additional File:**

**Cell Line Authentication and Mycoplasma Testing Reports**

# 1.STR Authentication

Cell Line: TCMK-1

Testing Agency: FuHeng Cell Center, Shanghai, China

Conclusion: The STR profile matches the known database for TCMK-1 cells. The cell line is authentic.

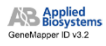

20210701shu

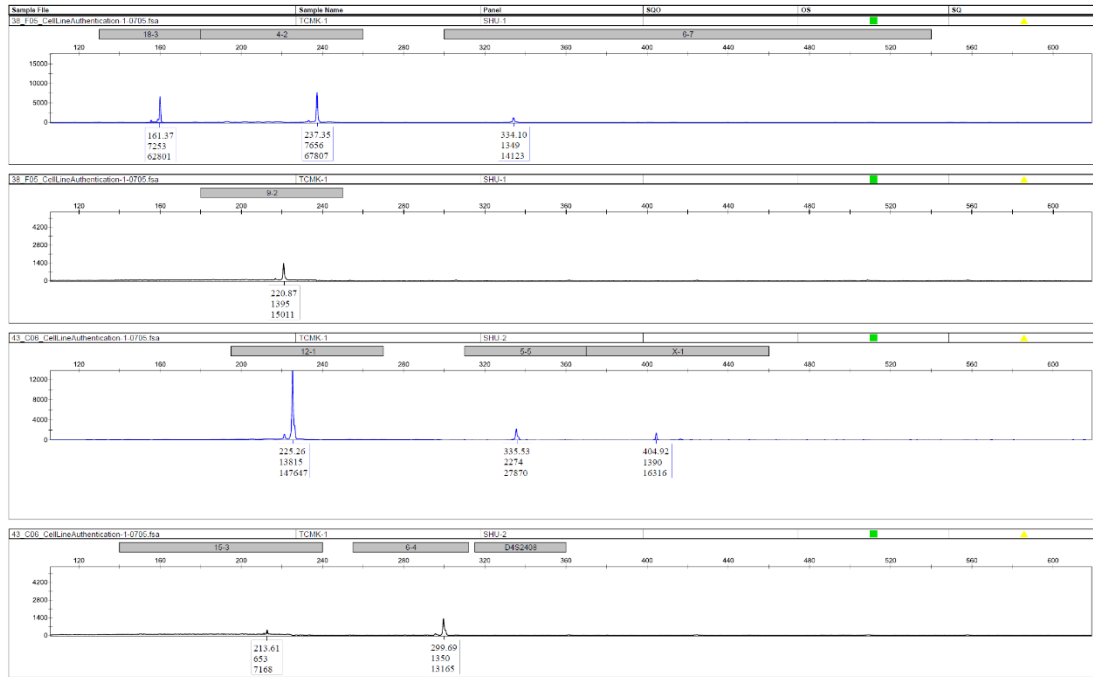

# 2: Mycoplasma Testing

Method: PCR-based detection

Result: Negative.

Conclusion: The cell culture is free from mycoplasma contamination.

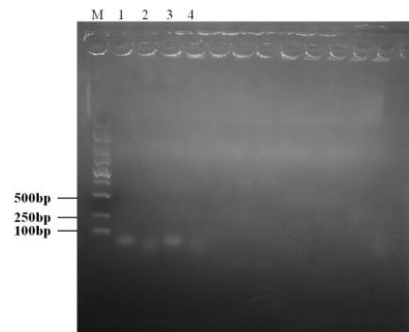

Lane M: DL5000 Marker;

Lane 1: Mycoplasma 1;

Lane 2: Mycoplasma 2;

Lane 3: Mycoplasma 3;

Lane 4: Mycoplasma 4
